# Supplementary material for: Effects of Prevalent and Incident Atrial Fibrillation on Renal Outcome, Cardiovascular Events, and Mortality in Patients with Chronic Kidney Disease
Source: PubMed Central journal article supplement (PMC6780958; doi:10.3390/jcm8091378), 2019-09-03
Supplement: jcm-08-01378-s001.pdf [file jcm-08-01378-s001.pdf]

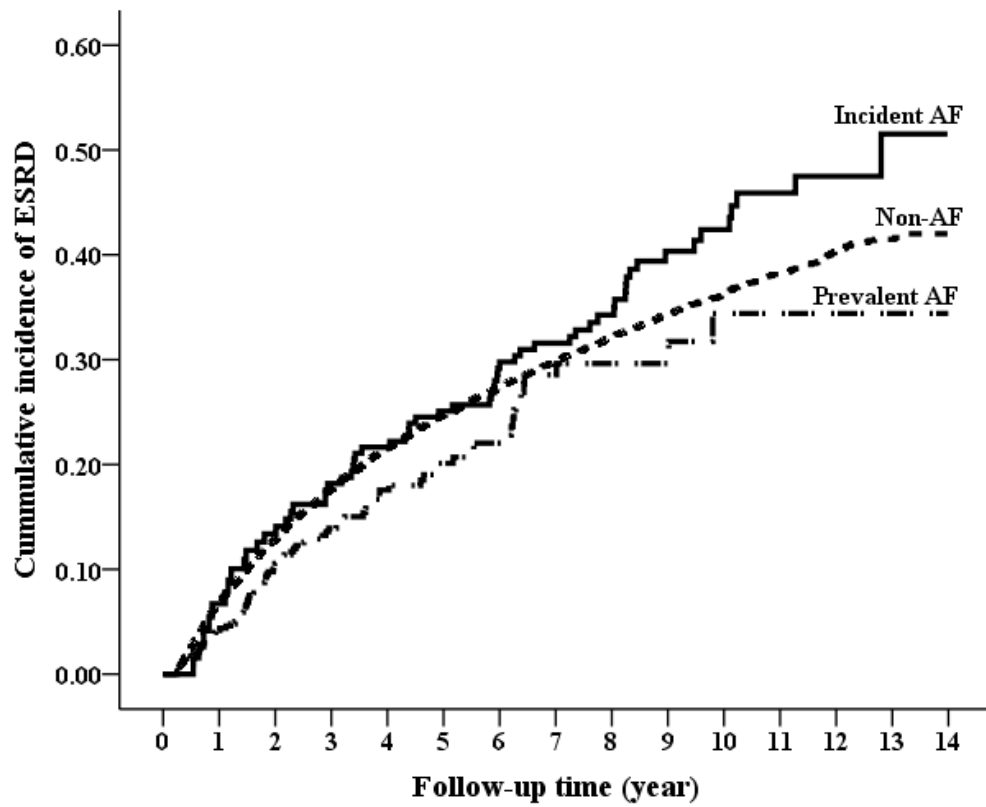

Figure 1. Cumulative incidence of ESRD amongst participants with non-AF, prevalent AF and incident AF.

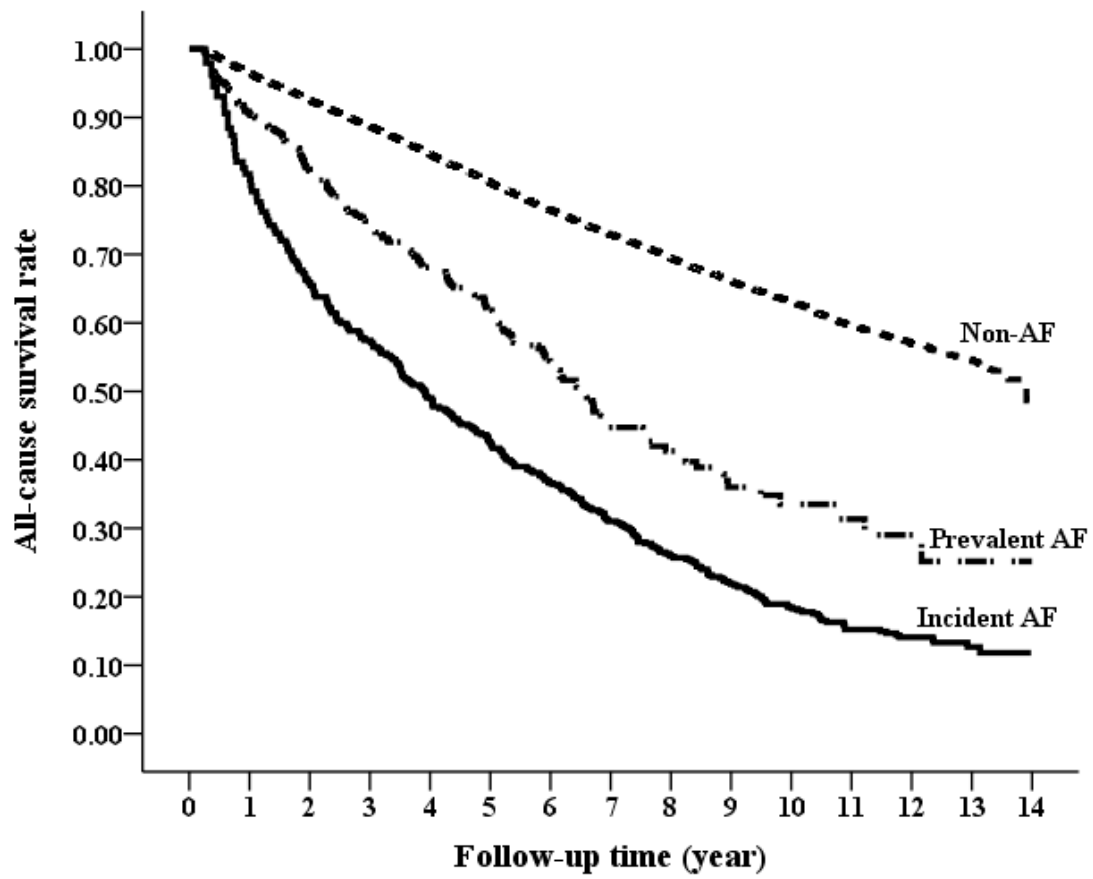

Figure S2: Cumulative survival curves amongst participants with non-AF, prevalent AF and incident AF.

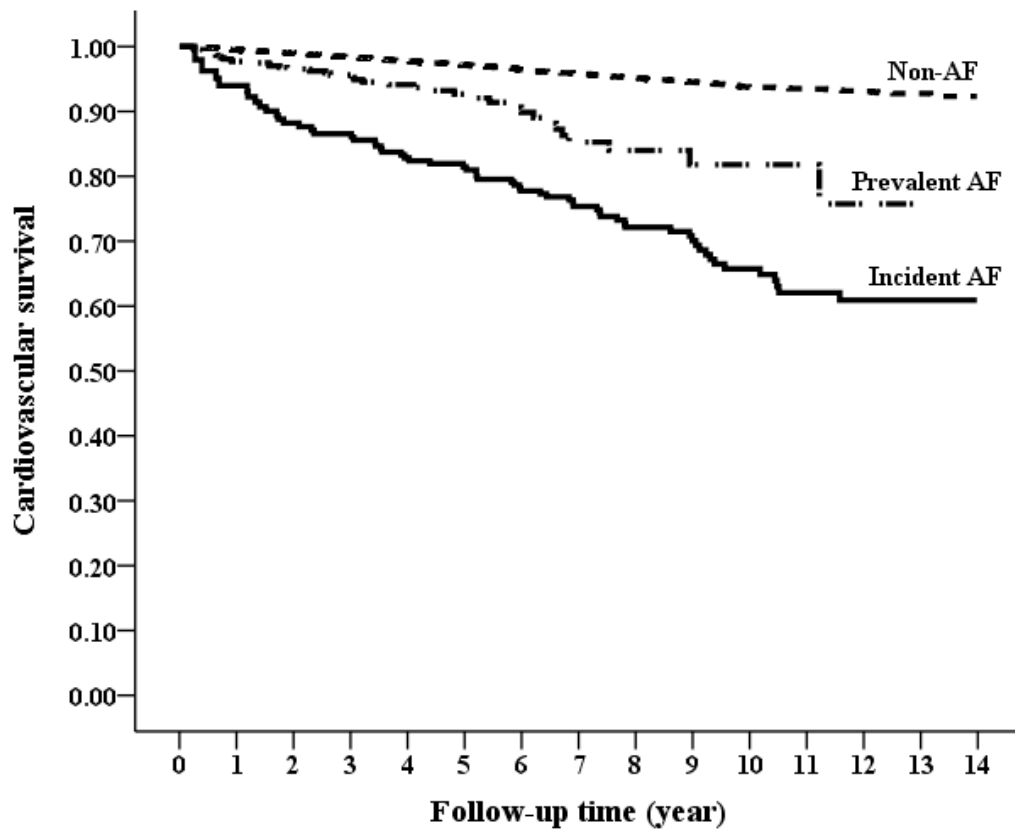

Figure S3: Cumulative survival curves free of cardiovascular death amongst participants with non-AF, prevalent AF and incident AF.

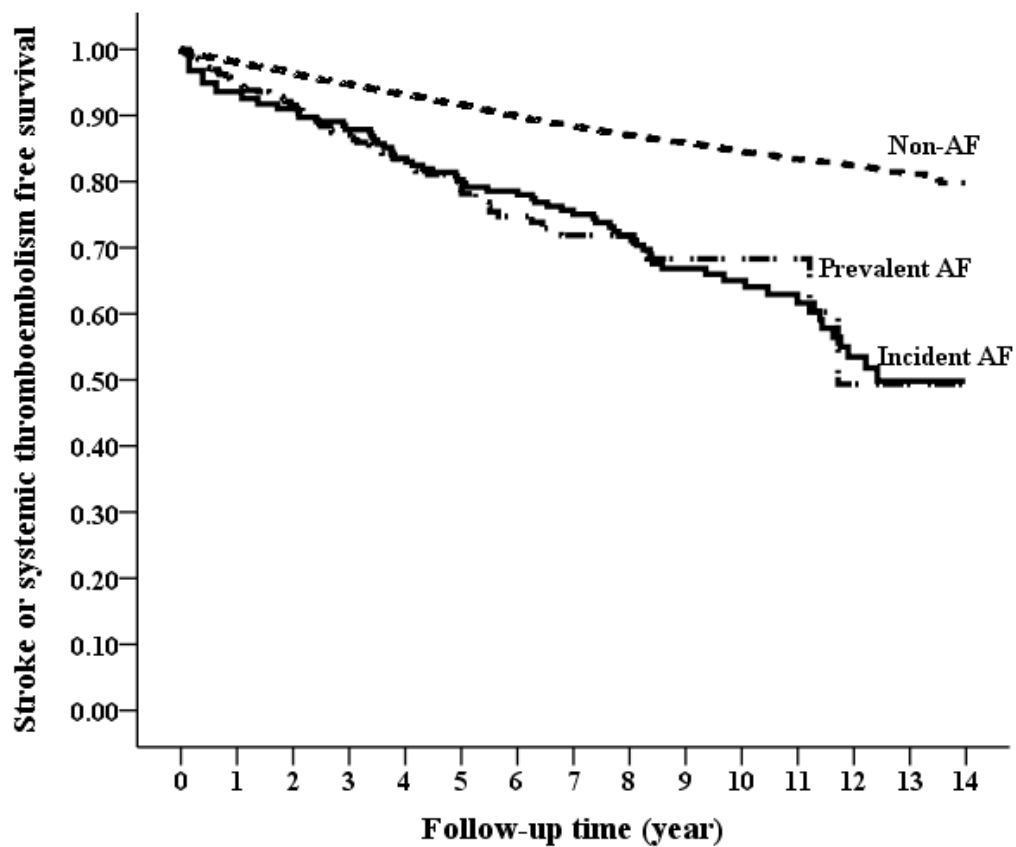

Figure S4: Cumulative survival curves free of stroke of systemic thromboembolism amongst participants with non-AF, prevalent AF and incident AF.

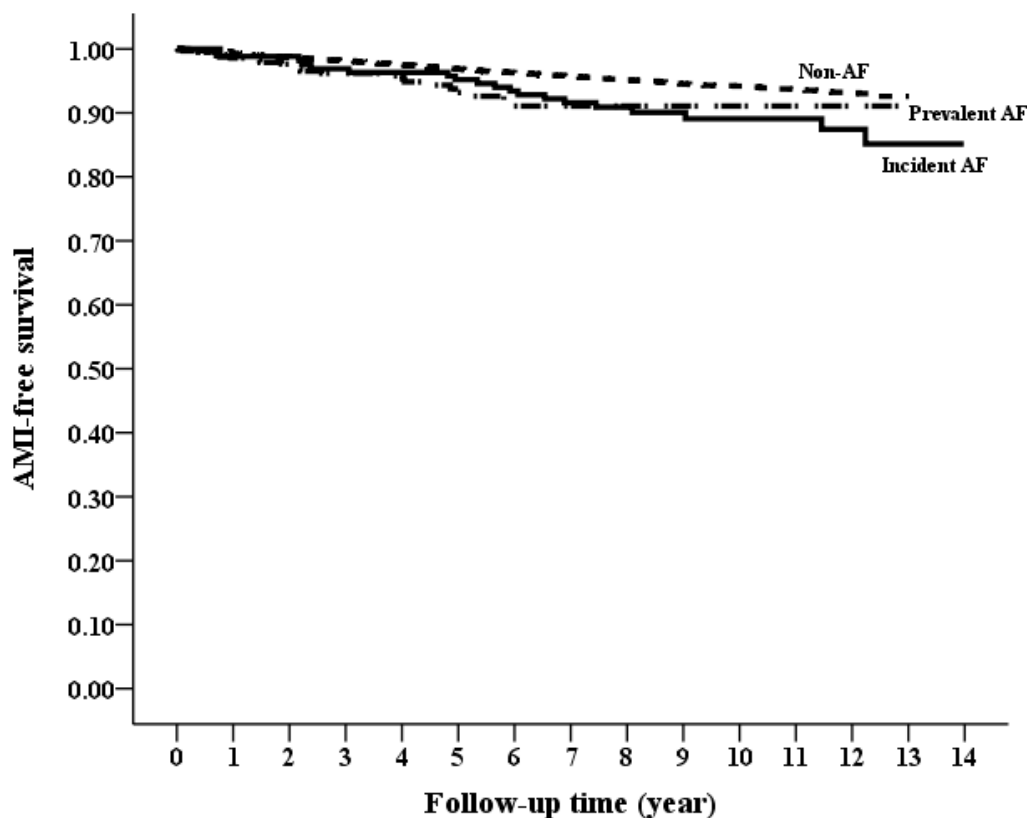

Figure S5: Cumulative survival curves free of acute myocardial infarction amongst participants with non-AF, prevalent AF and incident AF.

Supplementary Table 1. ICD-9-CM codes used to identify chronic kidney disease, atrial fibrillation, comorbidities and the cause of death.

| Diseases                    | Corresponding ICD-9-CM codes       |
|-----------------------------|------------------------------------|
| Chronic kidney disease      | 585.x                              |
| Atrial fibrillation         | 427.31                             |
| Acute myocardial infarction | 410, 429.5, 429.6, 429.71, 429.79  |
| Co-morbid diseases          |                                    |
| Coronary artery disease     | 410.x–414.x                        |
| COPD                        | 491.x, 492.x, 496.x                |
| Cancer                      | 140-165, 170-172, 174-195, 200-208 |
| Cirrhosis                   | 571                                |
| Dementia                    | 290                                |
| Rheumatoid disease          | 446.5, 710, 714, 725               |
| Peptic ulcer disease        | 531-534                            |

CHA2DS2-VASc

|                             |                                                                                   |
|-----------------------------|-----------------------------------------------------------------------------------|
| Heart failure               | 428.x                                                                             |
| Hypertension                | 401.x–405.x                                                                       |
| Diabetes mellitus           | 250.x                                                                             |
| Ischemic stroke             | 433, 434                                                                          |
| Transient ischemic attack   | 435.9, 435.2, 435.8                                                               |
| Peripheral artery embolism  | 444                                                                               |
| Pulmonary embolism          | 415.0, 415.9                                                                      |
| Acute myocardial infarction | 410, 429.5, 429.6, 429.71, 429.79                                                 |
| Aortic plaque               | 440.0, 440.2, 440.30, 440.31, 440.32, 440.71, 440.8,<br>440.9, 441, 443.9, 443.91 |

---

**Causes of Death**

---

|                      |                                                                                                                |
|----------------------|----------------------------------------------------------------------------------------------------------------|
| Cardiovascular death | 390.x – 398.x, 410.x – 414.x, 4151, 41511, 41519, 420.x,<br>422.x – 429.x, 431.x, 433.x – 436.x, 518.4, 785.51 |
|----------------------|----------------------------------------------------------------------------------------------------------------|

---

Abbreviation: COPD, chronic obstructive pulmonary disease; ICD-9-CM, International Classification of Disease, 9<sup>th</sup> Revision, Clinical Modification.

**Supplementary Table 2. Risks for ESRD, stroke or systemic thromboembolism, acute myocardial infarction and mortality among patients with CKD by AF status after re-classification of incident AF as prevalent AF (non-AF as the reference)**

|                                    | Within 30 days  |         | Within 90 days  |         | Within 180 days |         |
|------------------------------------|-----------------|---------|-----------------|---------|-----------------|---------|
|                                    | aHR (95% CI)    | P-value | aHR (95% CI)    | P-value | aHR (95% CI)    | P-value |
| <b>ESRD</b>                        |                 |         |                 |         |                 |         |
| Non-AF                             | 1               |         | 1               |         | 1               |         |
| Prevalent AF                       | 1.47(1.39,1.55) | <.0001  | 1.41(1.34,1.50) | <.0001  | 1.62(1.53,1.71) | <.0001  |
| Incident AF                        | 3.27(3.08,3.48) | <.0001  | 3.73(3.50,3.97) | <.0001  | 3.24(3.03,3.47) | <.0001  |
| <b>Stroke</b>                      |                 |         |                 |         |                 |         |
| Non-AF                             | 1               |         | 1               |         | 1               |         |
| Prevalent AF                       | 1.75(1.63,1.88) | <.0001  | 1.77(1.65,1.90) | <.0001  | 1.76(1.64,1.89) | <.0001  |
| Incident AF                        | 1.49(1.37,1.62) | <.0001  | 1.46(1.34,1.59) | <.0001  | 1.61(1.47,1.76) | <.0001  |
| <b>Acute myocardial infarction</b> |                 |         |                 |         |                 |         |
| Non-AF                             | 1               |         | 1               |         | 1               |         |
| Prevalent AF                       | 1.08(0.95,1.23) | 0.260   | 1.01(0.89,1.15) | 0.8473  | 1.01(0.89,1.15) | 0.892   |
| Incident AF                        | 1.75(1.54,2.00) | <.0001  | 1.95(1.70,2.23) | <.0001  | 2.16(1.88,2.48) | <.0001  |
| <b>All-cause mortality</b>         |                 |         |                 |         |                 |         |
| Non-AF                             | 1               |         | 1               |         | 1               |         |
| Prevalent AF                       | 1.70(1.62,1.79) | <.0001  | 1.78(1.70,1.87) | <.0001  | 1.77(1.69,1.86) | <.0001  |
| Incident AF                        | 2.29(2.17,2.41) | <.0001  | 2.22(2.10,2.34) | <.0001  | 2.30(2.17,2.43) | <.0001  |
| <b>CV mortality</b>                |                 |         |                 |         |                 |         |
| Non-AF                             | 1               |         | 1               |         | 1               |         |
| Prevalent AF                       | 3.22(2.85,3.63) | <.0001  | 3.46(3.08,3.89) | <.0001  | 3.38(3.01,3.79) | <.0001  |

---

|             |                 |        |                 |        |                 |        |
|-------------|-----------------|--------|-----------------|--------|-----------------|--------|
| Incident AF | 4.81(4.25,5.43) | <.0001 | 4.75(4.19,5.39) | <.0001 | 4.98(4.38,5.67) | <.0001 |
|-------------|-----------------|--------|-----------------|--------|-----------------|--------|

---

CI, confidence interval; HR, hazard ratio; CKD, chronic kidney disease; AF, atrial fibrillation.

aHR was calculated from adjustment for all variables in Table 1 with medications (aspirin / clopidogrel and warfarin) treated as time-dependent variables
